# Supplementary material
Source: PubMed Central journal article supplement (PMC5384872)
Supplement: NIHMS828277-supplement-1.pdf [file NIHMS828277-supplement-1.pdf]

**A**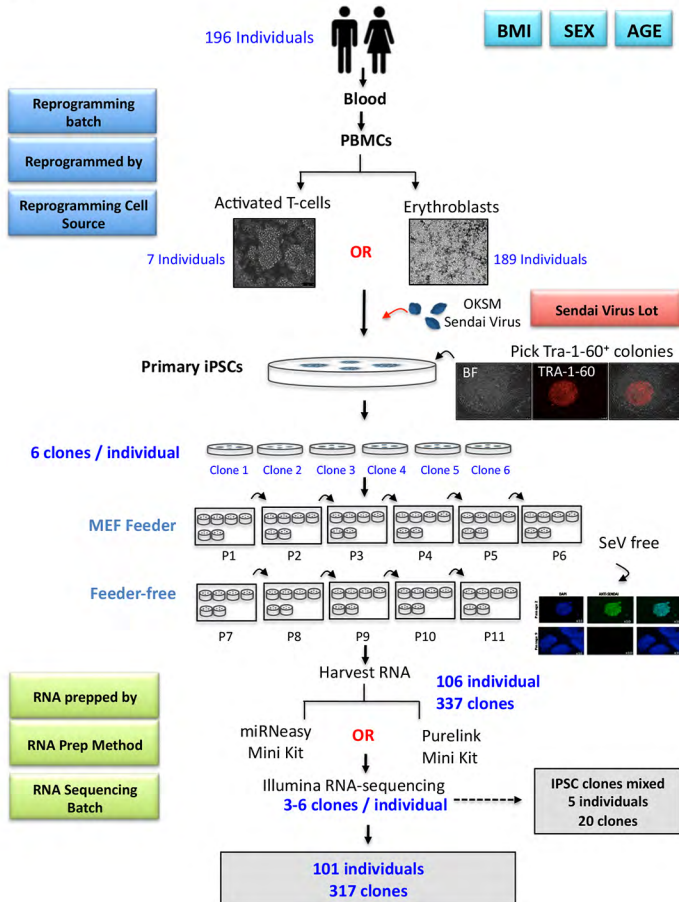**B**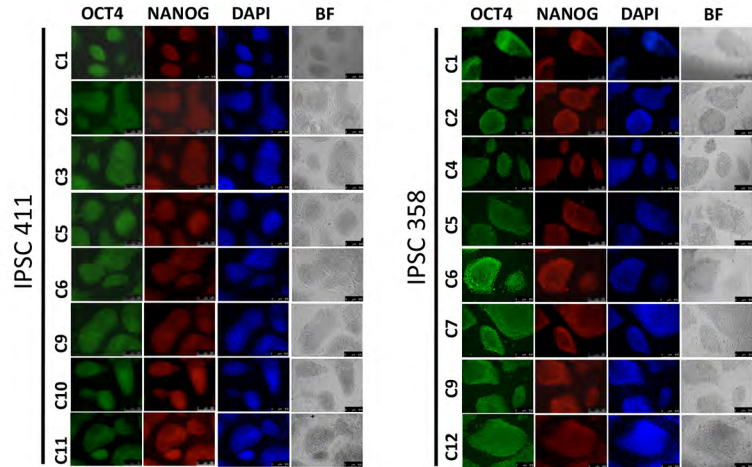

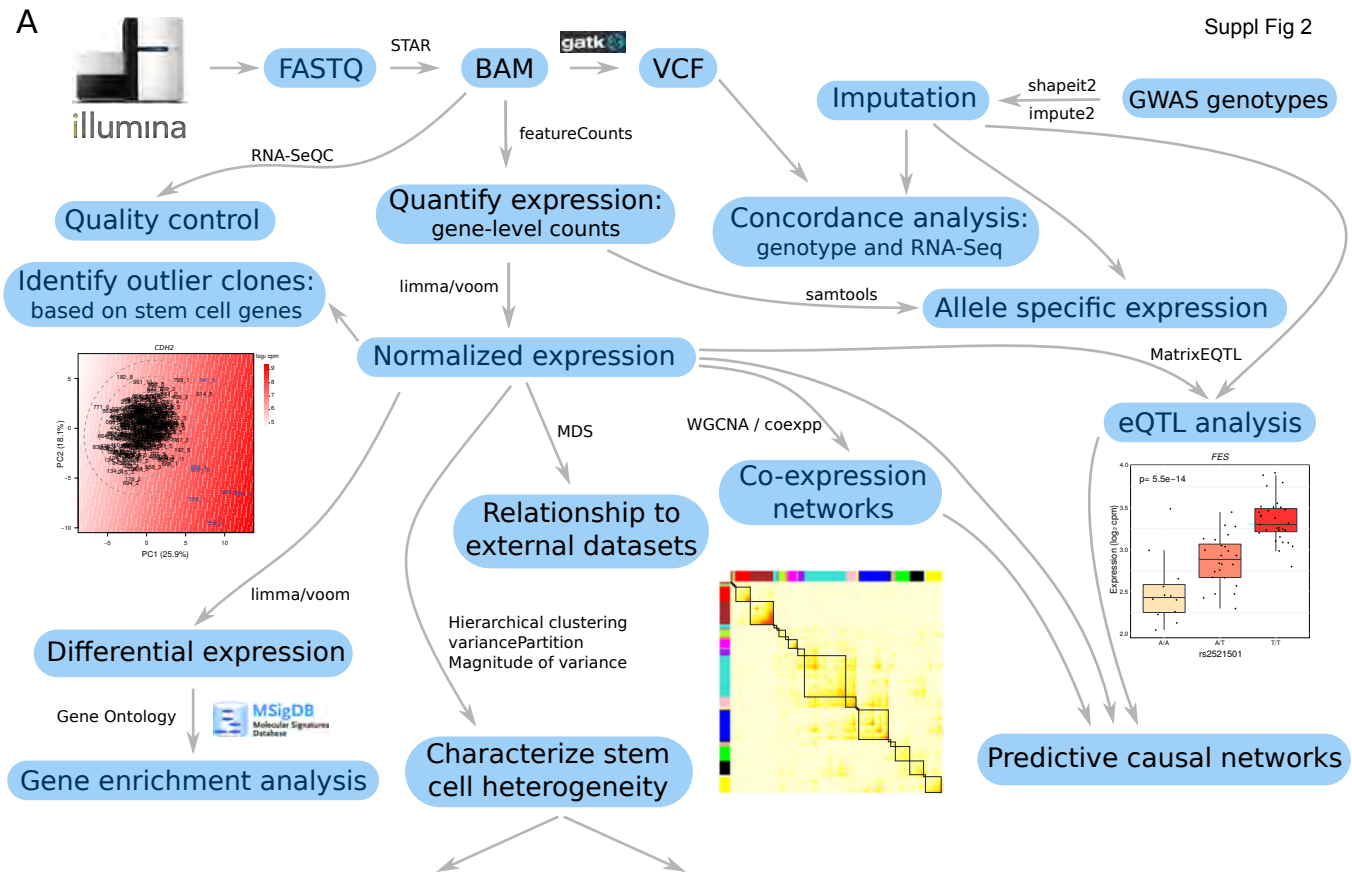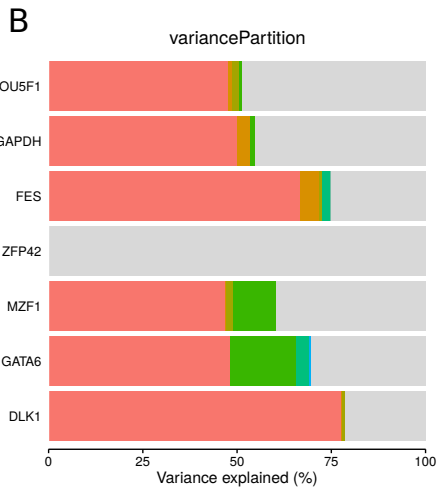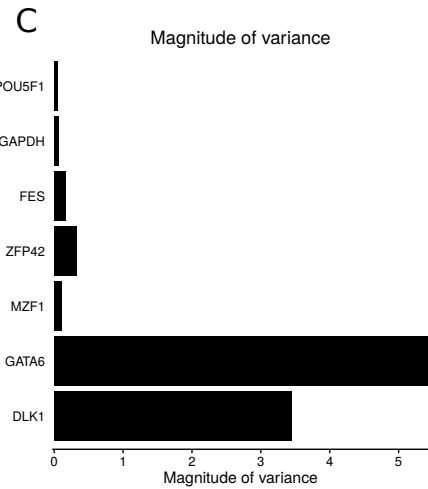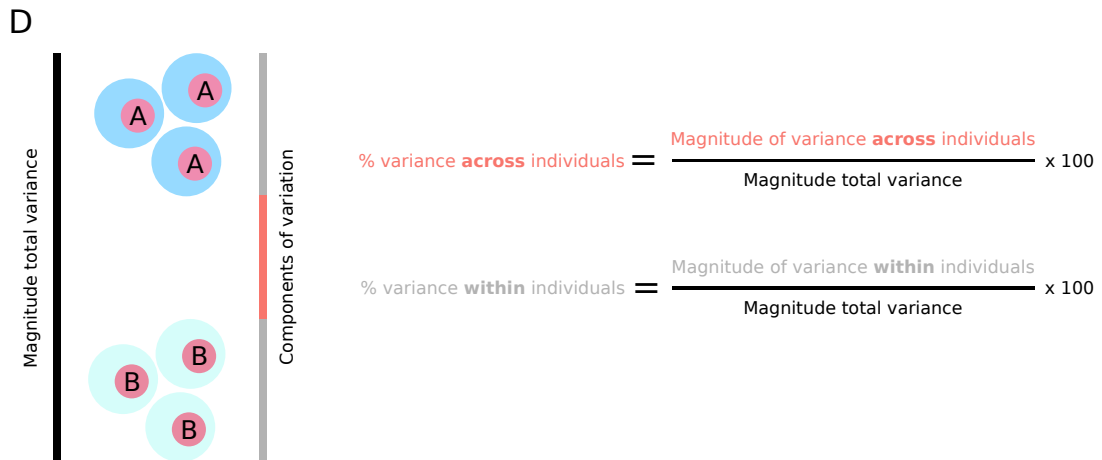

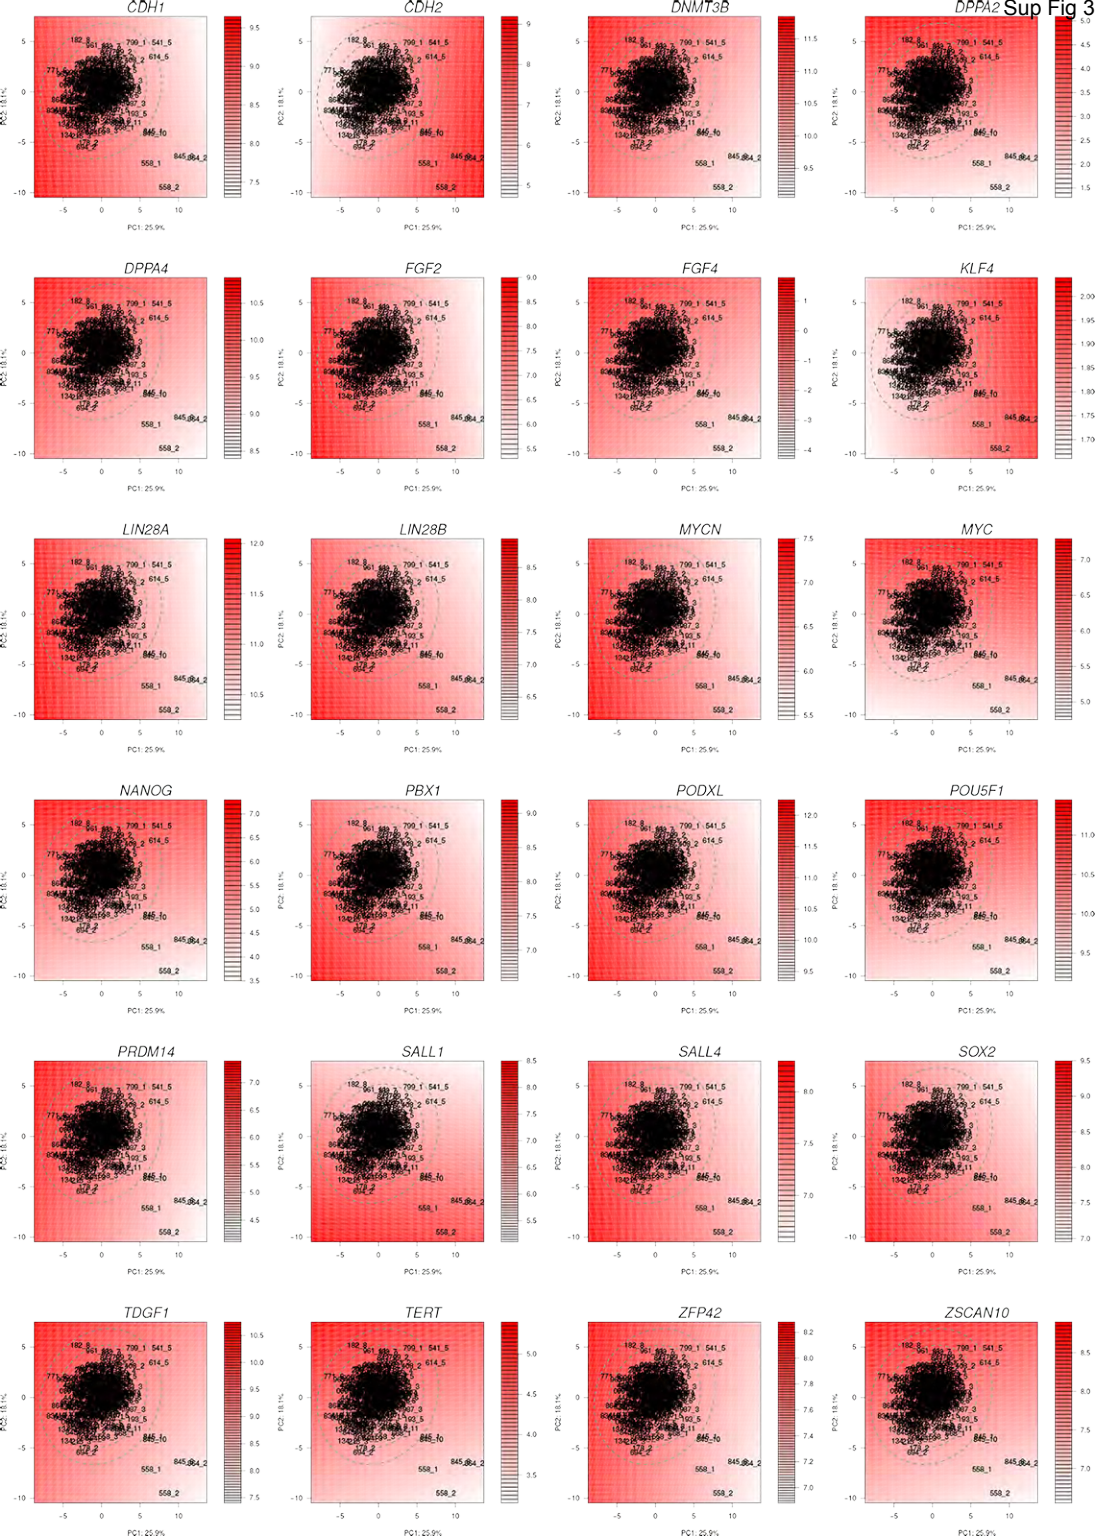

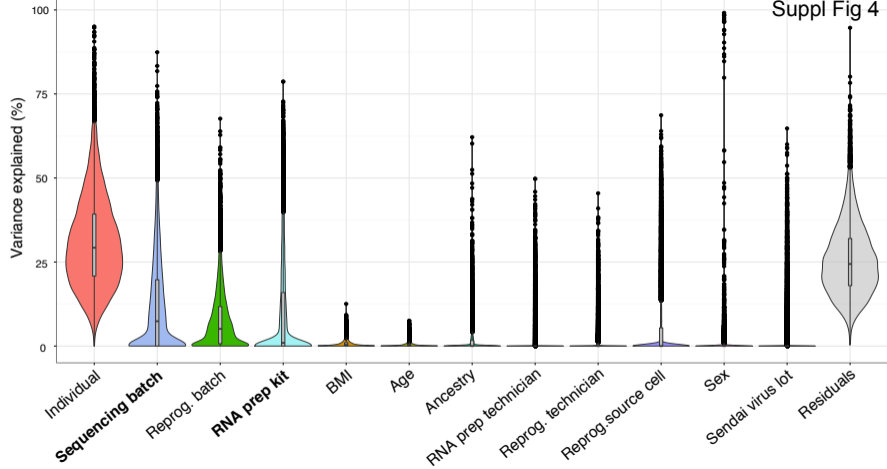

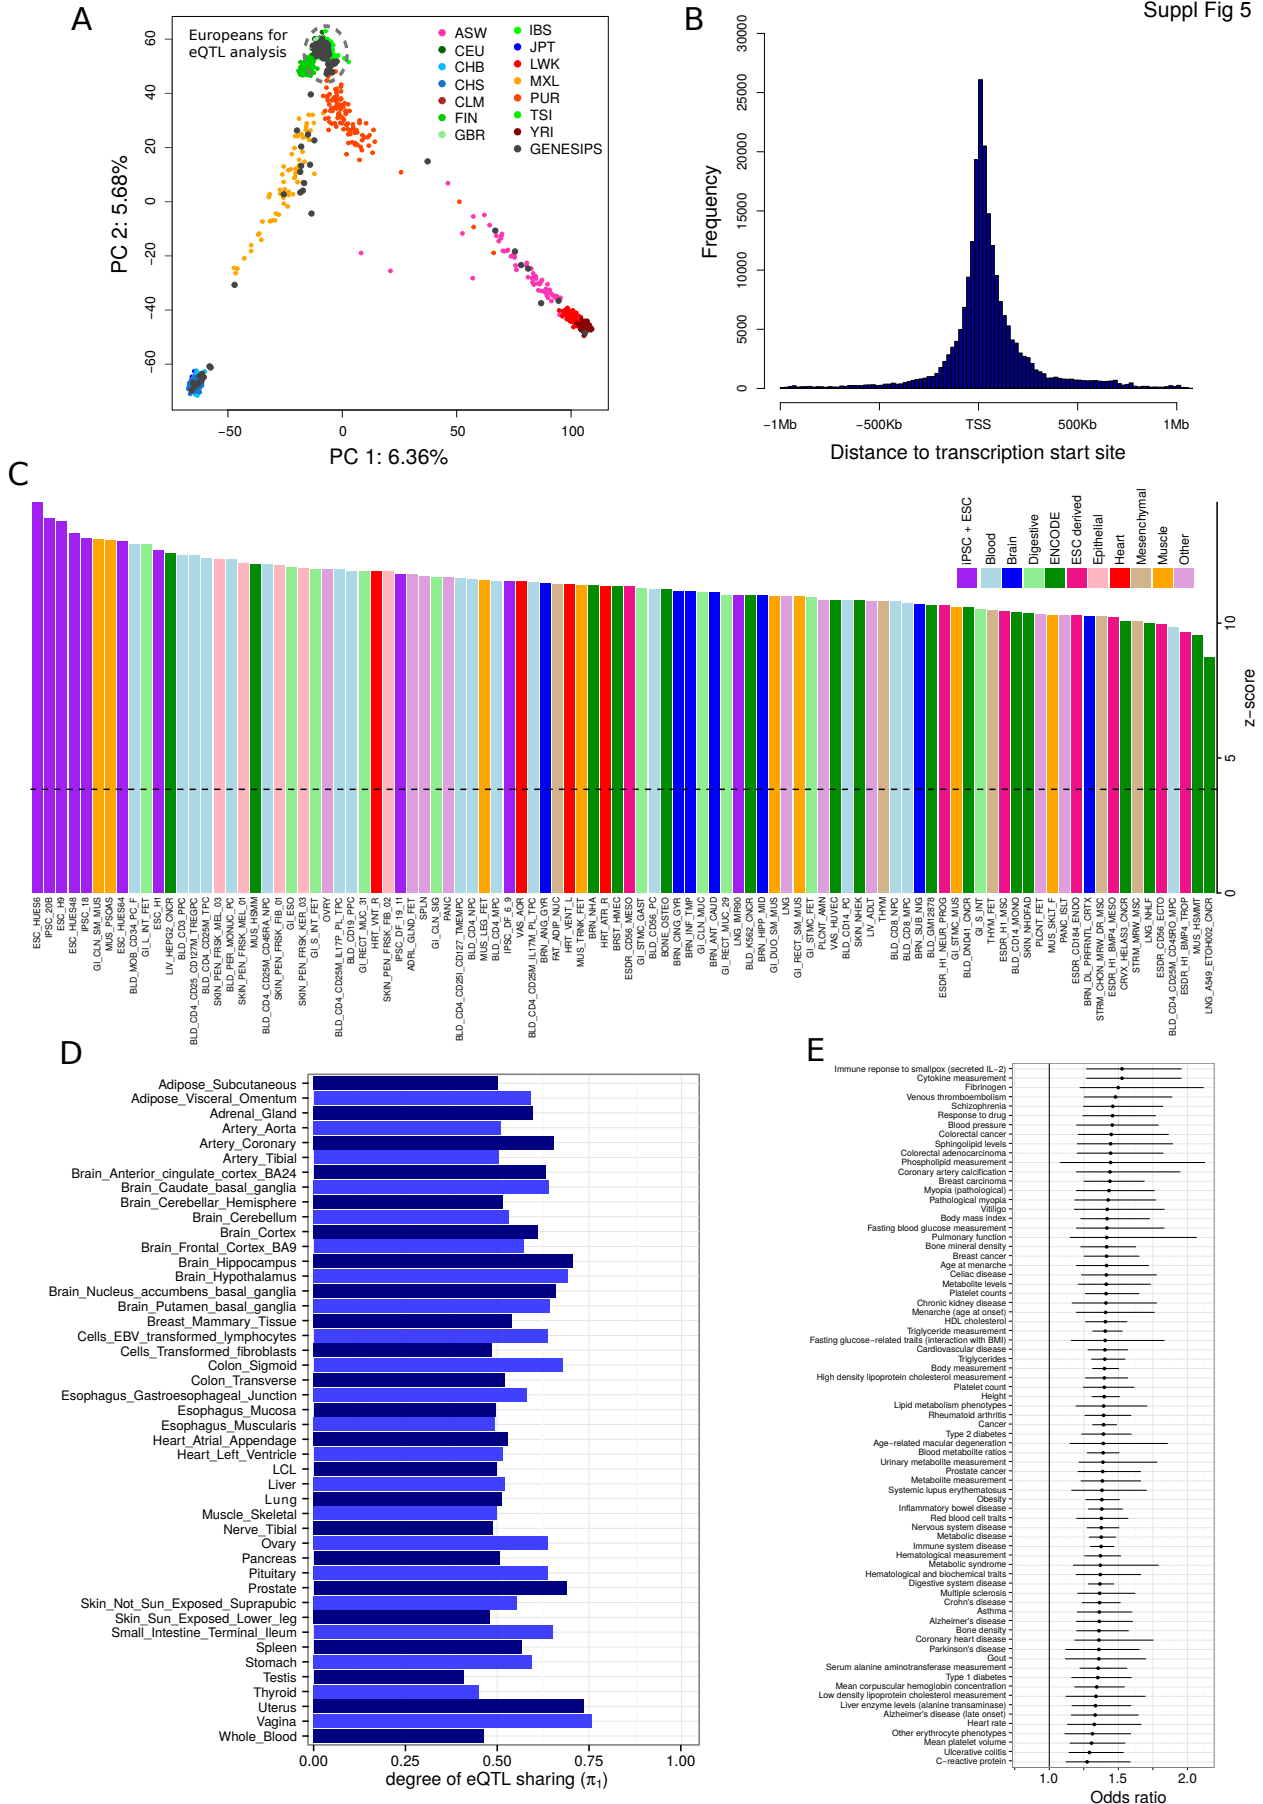

A

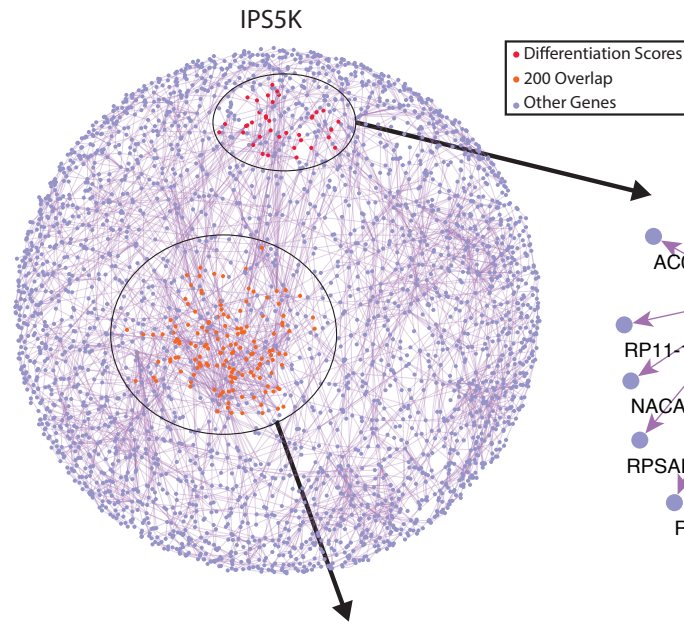

B

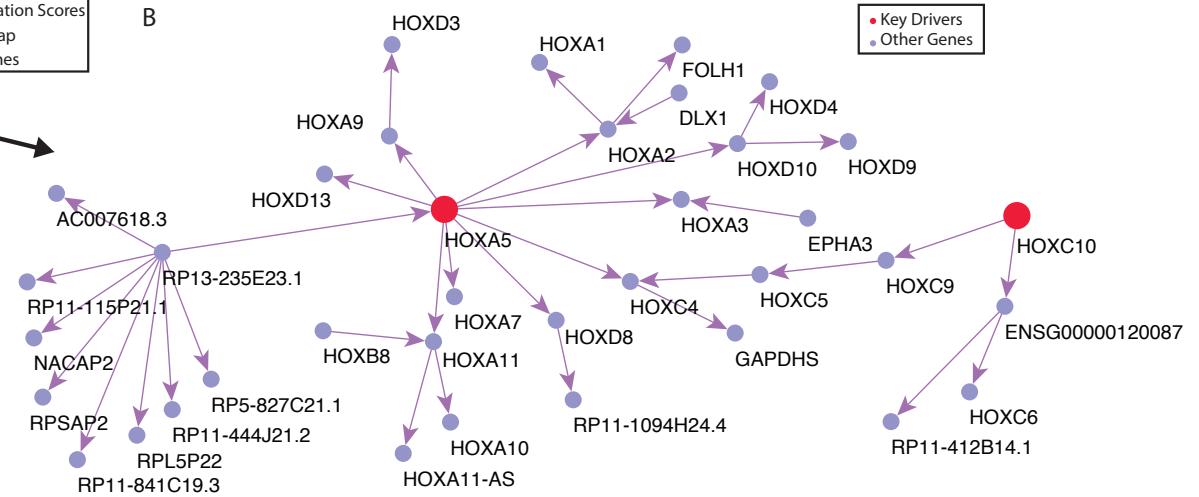

C

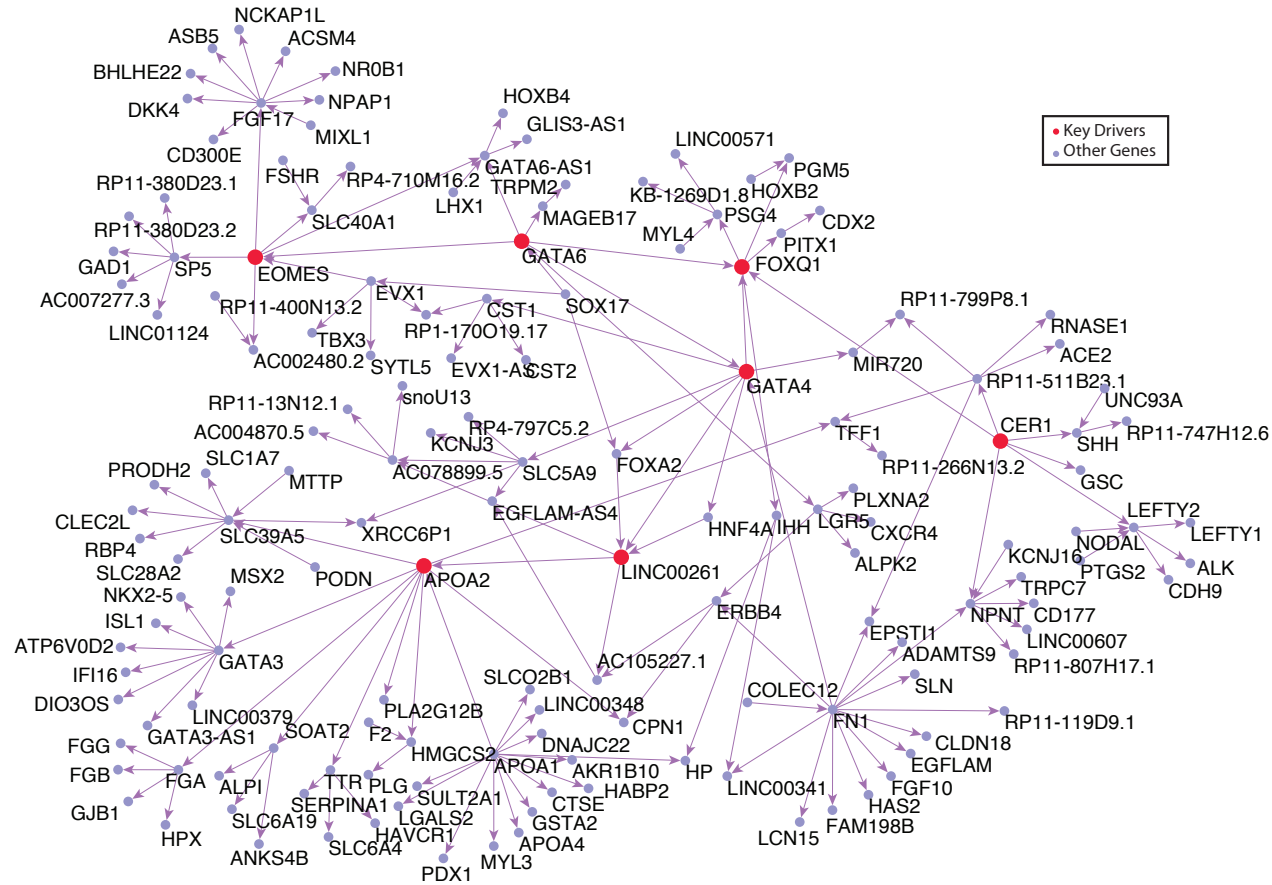

A

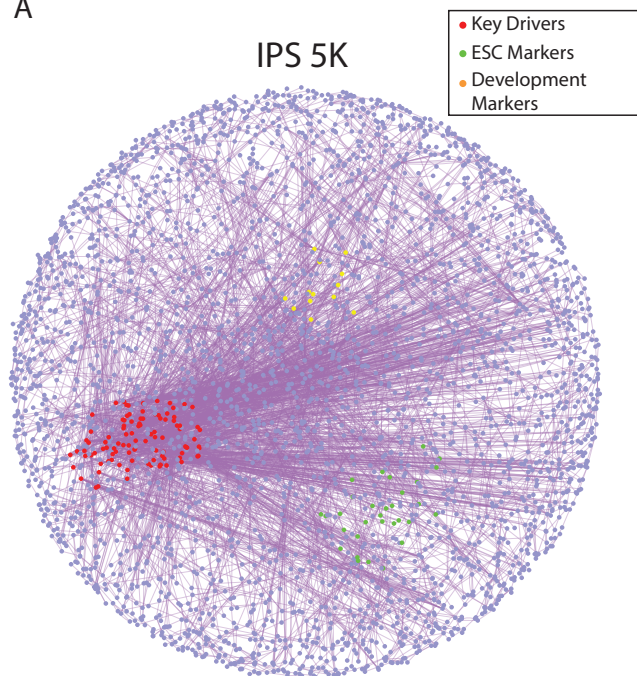

B

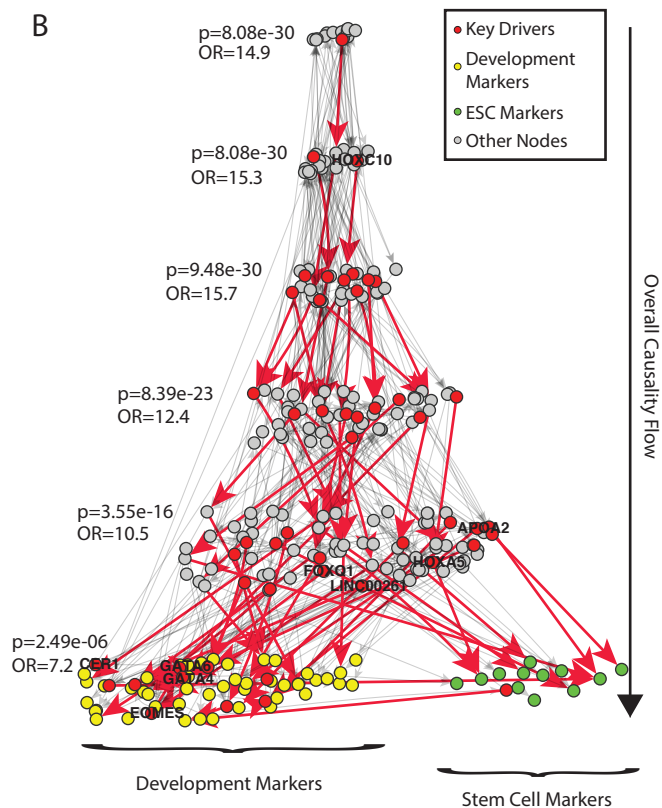

C

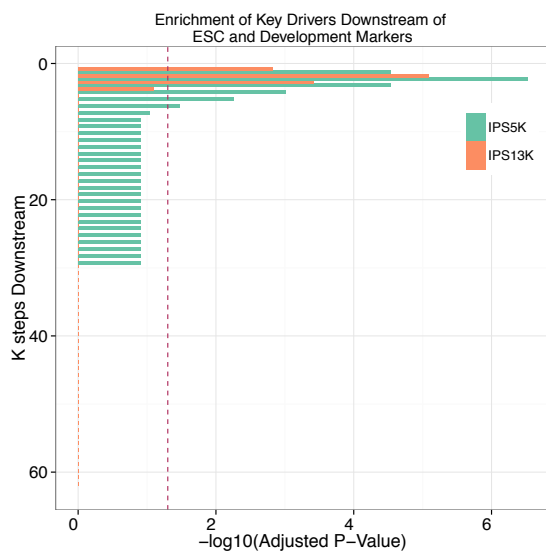

D

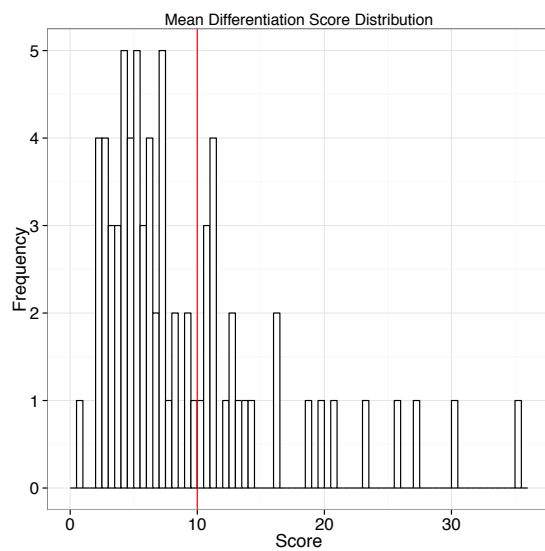

## SUPPLEMENTAL LEGENDS

**Figure S1. Outline for Generation and Characterization of Human iPSCs, Related to STAR methods.** **A)** T-cells and erythroblasts expanded from PBMC cultures were infected with Sendai virus containing the Yamanaka factors and grown on MEFs for 12 days. TRA1-60 positive colonies (6 per subject) were further expanded for 6 passages (P1-P6) on MEF monolayer and subsequently in feeder-free conditions. Cells were harvested between passages P8-P11 for stock preparation and RNA extraction for RNAseq analysis. During iPSC characterization, 20 clones from 5 individuals were disqualified while 317 clones from 101 individuals were included in the final analysis. Contribution of biological factors (donors' age, BMI, sex) and technical factors (reprogramming batch and technician, reprogramming source, Sendai virus lot, RNA isolation and technician, RNA sequencing batch) were considered for assessing the transcriptional variability in iPSC lines. **B)** Immunostaining with human anti-Oct4 (green) and anti-Nanog (red) antibodies to assess pluripotency in iPSC lines. DAPI (blue) was used for nuclear staining. BF indicates brightfield images. Data of two representative iPSC lines (iPSC 411 and 358) is shown.

**Figure S2. Summary of analysis workflow with multiple computational methods, Related to Figure 1, Figure 4 and STAR methods.** **A)** Computational workflow for RNA-seq and genotype array processing and analysis. **B)** Illustration of how variation in gene expression is attributed to multiple variables in the study design using the variancePartition method. The contribution of each variable to variation in each gene is summarized with a percentage. **C)** The magnitude of variance can be quantified for each gene. This perspective on variation is complementary to the results of variancePartition. **D)** Illustration of the relationship between contribution to variance and magnitude of variance. Cartoon shows 3 iPSC lines from individuals A and B. Variability can be described in terms of 1) the magnitude of variance in the dataset or 2) the fraction (or contribution) of variance attributable to variation across and within these individuals. While this illustration considers a single variable, the variancePartition method considers multiple variables in the study design.

**Figure S3. Principal Components Analysis of 24 Key Pluripotency Related Genes, Related to Figure 1.** The expression gradient is shown for each gene.

**Figure S4. VariancePartition Analysis of RNA-seq Data Illustrates Biological and Technical Variation at Multiple Levels, Related to Figure 1.** Expression variation across sequencing batches and RNA preparation kits is substantial and these sources of variation are labeled in bold. All other analyses were performed on the expression residuals after the effect of these two variables were removed.

**Figure S5. Analysis of eQTL results indicates genomic enrichments, Related to Figure 2.** **A)** Principal components analysis of genotype data from the current study and the 1000 Genomes Project identifies individuals of European ancestry. Individuals from the current study are shown in black and most cluster with European individuals colored in green. The dashed ellipse indicates the individuals (n=81) that were included in the eQTL analysis. **B)** Genome-wide significant cis-eQTLs are centered around the transcription start site of their respective genes. **C)** eQTLs show highest enrichment in promoters in iPSCs and ESCs identified by the Roadmap Epigenomics Consortium (Roadmap Epigenomics Consortium, 2015). Z-scores indicate the degree of enrichment in enhancers represented in cells and tissues samples from (Roadmap Epigenomics Consortium, 2015). Bars are colored based on tissue origin. The dashed line indicates the Bonferroni cutoff for multiple testing. **D)** Overlap of eQTLs discovered in the current dataset with eQTLs from GTEx using Storey's  $\pi_1$ . The  $\pi_1$  statistic indicated the fraction of eQTLs discovered in iPSCs that are shared by these external datasets. **E)** Enrichment of eQTLs detected in this dataset with GWAS hits from the GWAS Catalog.

**Figure S6. 5K Sub-networks Downstream of Key Driver Genes of Interest Contribute to the iPSC Variability, Related to Figure 6 and 7.** **A)** Causal molecular mechanism among 5,000 most varying genes; The sub-networks 2 steps away from the key drivers of interest highlighted in b) and c) are shown in red and orange respectively; **B)** Sub-network 2 steps away from the key driver genes of the top 500 differentially expressed genes for the differentiation score to endothelial cells; **C)** Sub-network 2 steps away from the key driver genes of the 200 genes shared between the top 500 genes most varying within individual and the top 500 genes most varying across individuals.

**Figure S7. Key Driver Genes Validation and Distribution of Differentiation Scores, Related to Figure 6 and 7.** **A)** Causal molecular networks covering the 5000 most varying genes. The key driver genes are highlighted in red, the stem cell markers in green and the development markers in orange. **B)** This Eiffel Tower plot shows the overall causality flow (top to bottom) from any stem cell (green) or development (yellow) markers to any upstream causal gene in the 5K network. It shows the enrichment of key driver genes (red) at every step upstream of the markers with the level-associated Fisher's test p-value on the left. **C)** Barplot of the  $-\log_{10}(\text{enrichment p-value})$  of the key driver genes at each step downstream of the stem cell and development markers for both networks. **D)** Histogram of the distribution of the differentiation scores from iPS to endothelial cells. The red line represents the cutoff for the differential expression analyses.



**Table S1. Patient Demographic Data and iPSC Generation Information, Related to STAR methods**

**Table S2. Variance Partition and Magnitude of Variance Results, Related to Figure 1 and 4**

**Table S3. GO enrichments for modules, GSEA enrichments for modules, Related to Figure 4 and 5**

**Table S4. GO enrichments for fig.4B, GSEA enrichments for fig. 4E, DE gene list for differentiation score, list of 500 most varying genes within patients, list of 500 most varying genes across patients, Related to Figure 4, 6 and 7**

**Table S5. BN 13K, BN 5K, eQTLs used as prior for BN, Seeding gene list BN 5K, Seeding gene list BN 13K, Coexpression network, KDs BN 5K, KDs BN 13K, Related to Figure 6 and 7**

**Table S6. Quantification of Endothelial Differentiation, Related to Figure 6**

**Table S7. List of 197 iPSC/ESC pluripotency and developmental markers, Related to Figure 7**
